# Supplementary material for: Two-dimensional carbazole-based COFs for high-performance lithium–sulfur batteries
Source: Royal Society of Chemistry journal article supplement (doi:10.1039/d4cc03563a), 2024-01-01
Supplement: d4cc03563a1.pdf [file d4cc03563a1.pdf]

## Supporting Information

# Two-dimensional Carbazole-based COFs for High-Performance Lithium-sulfur Batteries

Yuchen Xiao,<sup>abc</sup> Shanyue Wei,<sup>abd</sup> Xuan Wang,<sup>abd</sup> Jia Liu,<sup>ab</sup> Xiaowei Wu,<sup>ab\*</sup> Yiming Xie<sup>ad</sup> and Can-Zhong Lu<sup>abc\*</sup>

<sup>a</sup> State Key Laboratory of Structural Chemistry, Fujian Institute of Research on the Structure of Matter, Chinese Academy of Sciences, Fuzhou 350002, China.

<sup>b</sup>Xiamen Key Laboratory of Rare Earth Photoelectric Functional Materials, Xiamen Institute of Rare Earth Materials, Haixi Institutes, Chinese Academy of Sciences, Xiamen, 361021, China.

<sup>c</sup>School of Physical Science and Technology, ShanghaiTech University, Shanghai, 201210, China.

<sup>d</sup>Engineering Research Center of Environment-Friendly Function Materials, Ministry of Education, College of Materials Science & Engineering, Huaqiao University, Xiamen 361021, China.

Email: xmwuxiaowei@fjirsm.ac.cn; czlu@fjirsm.ac.cn

|                                     |           |
|-------------------------------------|-----------|
| <b>1. Materials and methods</b>     | <b>1</b>  |
| <b>2. Synthesis procedures</b>      | <b>2</b>  |
| <b>3. Preparation of cathode</b>    | <b>4</b>  |
| <b>4. Experimental data</b>         | <b>5</b>  |
| <b>5. Structure simulation data</b> | <b>10</b> |
| <b>6. Others</b>                    | <b>14</b> |
| <b>7. References</b>                | <b>15</b> |

# 1. Materials and methods

All the chemicals are commercially available, and used without further purification.

**Powder X-ray diffraction (PXRD):** PXRD patterns were collected on a Rigaku Miniflex 600 using Cu K $\alpha$  radiation ( $\lambda = 1.5418 \text{ \AA}$ ).

**Fourier transform infrared (FT-IR):** IR spectrum was measured on a Thermo Nicolet iS 50 FT-IR spectrometer with Universal ATR accessory between the ranges of 4000 to 500  $\text{cm}^{-1}$ .

**Solution nuclear magnetic resonance (NMR):** Liquid state  $^1\text{H}$  nuclear magnetic resonance spectroscopy was collected on a Bruker Avance III instrument with AS500 magnet equipped with a cryoprobe (500 MHz).

**Scanning electron microscope (SEM):** SEM images were collected using a JSM-IT500HR.

**Solid-state nuclear magnetic resonance (ssNMR):** Solid state  $^{13}\text{C}$  cross polarization magic angle spinning nuclear magnetic resonance spectra ( $^{13}\text{C}$  CP-MAS NMR) were recorded on a JEOL JNM-ECA 400 MHz, 4.0 mm rotor, MAS of 10 kHz, recycle delay of 6.5  $\mu\text{s}$ .

**Transmission electron microscope (TEM):** TEM images were obtained with a Hitachi H-7650.

**The Brunauer-Emmett-Teller (BET):**  $\text{N}_2$  adsorption and desorption measurements were performed at 77 K using ASAP 2020, Micromeritics Instrument Corp, USA. Pore size distributions and pore volumes were derived from the adsorption isotherms.

**UV-Vis diffuse reflectance spectroscopy (UV-Vis DRS):** spectra were obtained by a UV-Vis spectrophotometer (UV-Vis-NIR Cary 5000) and the data were converted to Kubelka-Munk functions for the band gap extraction.

**Thermogravimetric analysis (TGA):** TGA was performed using a Mettler-Toledo TGA/DSC 1 under flowing Ar with 5  $\text{K min}^{-1}$  ramp rate. Samples were heated in a Platinum pan (800  $^\circ\text{C}$ , 10  $^\circ\text{C min}^{-1}$ ) under Ar flux (60  $\text{mL min}^{-1}$ ).

**Elemental analysis (EA):** EA data were collected using a Elementar Vario EL cube under CHN and CHNS model.

**X-ray photoelectron spectroscopy (XPS):** XPS was measured on a Thermo Scientific K-Alpha. Excitation source: Al K $\alpha$  ray ( $h\nu = 1486.6\text{eV}$ ), Beam spot: 400  $\mu\text{m}$ , the vacuum of the analysis room is better than 5.0E-7 mBar, operating voltage: 12 kV, filament current: 6 mA, full spectrum scanning: pass energy 150eV, step size 1eV; Narrow spectrum scanning: pass energy 50 eV, step size 0.1eV.

At least 5 cycles of signal accumulation for narrow spectrum. Binding energy correction: The energy standard of C1s=284.80 eV was used for charge correction.

**Crystal structure modeling:** Structural modeling of COFs was generated using the Materials Studio program (ver2019), the lattice model was geometrically optimized using force-field based method (Forcite, UFF, Ewald summations, Q<sub>eq</sub>). Pawley fitting was conducted by using the Reflex module.

**Density functional theory calculations:** The adsorption energies of CBPA-PDA and CBPA-BZ complexed with and polysulfides (Li<sub>2</sub>S<sub>x</sub>, 2≤x≤8.) were calculated using DFT based on the Materials Studios (MS) software. The DMol3 module was used for calculating the energy between the COFs and LiPSs. Perdew Burke Ernzerh of functionals were used to calculate exchange and related energy components (GGA-PBE). The electronic energy was considered self-consistent when the energy change was smaller than 10<sup>-5</sup> eV. A geometry optimization was considered convergent when the force change was smaller than 0.02 eV/Å. Considering the limitation of computing resources, the adsorption model is established by using CBPA coupled with four PDA/BZ monomers via imine linkage.

**Electrochemical characterization:** All electrochemical performances were measured at room temperature. The galvanostatic cycling performance tests were conducted on a Neware instrument at a voltage range of 1.7-2.8 V with different C rates. CHI 760E electrochemical workstation (Shanghai, China) was used to carry out the cyclic voltammetry (CV) measurements at a scan rate of 0.1 - 0.5 mV·s<sup>-1</sup>, and the electrochemical impedance spectroscopy (EIS) tests with a voltage amplitude of 5 mV in the frequency range 0.1-10<sup>5</sup> Hz. The specific capacity was calculated based on the weight of sulfur loaded in the cathode electrode.

Calculation of the Diffusion Coefficient of Lithium Ions[1]: D<sub>Li+</sub> could be calculated from the Randles–Sevcik equation, as shown below

$$I_p = 2.69 \times 10^5 n^{\frac{3}{2}} A D^{\frac{1}{2}} C v^{\frac{1}{2}}$$

where  $I_p$  represents the current of each peak (A),  $n$  is the number of electrons transferred during the reaction (for LSBs,  $n = 2$ ),  $A$  is the surface area of the cathode (cm<sup>2</sup>),  $D$  is the lithium-ion diffusion coefficient (cm<sup>2</sup> s<sup>-1</sup>),  $C$  is the concentration of Li in the electrolyte (mol L<sup>-1</sup>), and  $v$  represents the scanning rate (V s<sup>-1</sup>).

## 2. Synthesis procedures

5,5'-(9H-carbazole-2,7-diyl)diisophthalaldehyde (CBPA)

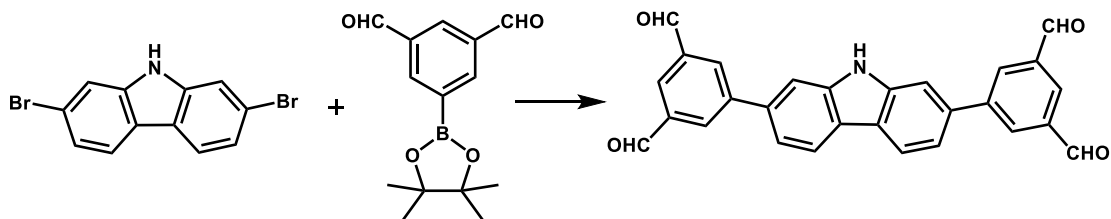

650 (2 mmol, 1 eq.) mg 2,7-dibromo-9H-carbazole, 1300 mg (5 mmol, 2.5 eq.) 1,3-Benzenedicarboxaldehyde,5-(4,4,5,5-tetramethyl-1,3,2-dioxaborolan-2-yl) (was synthesized according to the literature[2]), 2211 mg (16mmol, 8eq.)  $K_2CO_3$  and 23 mg  $Pd(PPh_3)_4$  were weighed and packed in 120 mL pressure bottle and adding 30 mL 1,4-dioxane and 6 mL  $H_2O$  as solvent. The reaction mixture was vacuumed and filled with inert gas three times and stirred at 120 °C for 48 h. After cooling to room temperature, the mixture was filtrated followed by rinsing with water and alcohol, and drying in vacuum to give a yellow powder of 5,5'-(9H-carbazole-2,7-diyl) diisophthalaldehyde (CBPA) (yield: 88.3%).  $^1H$  NMR (DMSO- $d_6$ , 500 MHz, ppm):  $\delta$ -11.59 (s, 1H), 10.24 (s, 4H), 8.63 (d, 4H), 8.39 (d, 2H), 8.35 (d, 2H), 7.96 (d, 2H), 7.68 (dd, 2H).  $^{13}C$  NMR (125 MHz, DMSO, ppm)  $\delta$  193.28, 143.17, 141.55, 137.91, 136.08, 133.70, 128.09, 122.77, 121.83, 118.64, 109.92.

#### CBPA-PDA

PDA (10.8 mg, 0.1 mmol) and CBPA (21.5 mg, 0.05 mmol) were added into a 10 mL Pyrex tube; then, a mixture of *o*-dichlorobenzene (*o*-DCB, 1.0 mL), *n*-butanol (*n*-BuOH, 1.0 mL), and acetic acid (aq 6 M, 0.2 mL) was added into this Pyrex tube. The Pyrex tube was sealed after being evacuated under vacuum for three pump–thaw cycles in a liquid nitrogen bath. After that, the sealed Pyrex tube was placed in a vacuum oven at 120 °C for 3 days. The solid was isolated by centrifugation, washed with ethyl acetate, and further purified by Soxhlet extraction with tetrahydrofuran, methanol, and trichloromethane. The sample was then transferred to a vacuum chamber and evacuated to 20 mTorr at 50 °C for 24 h, yielding COFs as dark green powders (yield: 28.1 mg, 87.0%).

#### CBPA-BZ

BZ (18.4 mg, 0.1 mmol) and CBPA (21.5 mg, 0.05 mmol) were added into a 10 mL Pyrex tube; then, a mixture of *o*-dichlorobenzene (*o*-DCB, 1.0 mL), *n*-butanol (*n*-BuOH, 1.0 mL), and acetic acid (aq 6 M, 0.2 mL) was added into this Pyrex tube. The Pyrex tube was sealed after being evacuated under vacuum for three pump–thaw cycles in a liquid nitrogen bath. After that, the sealed Pyrex tube was placed in a vacuum oven at 120 °C for 3 days. The solid was isolated by centrifugation, washed with ethyl acetate, and further purified by Soxhlet extraction with tetrahydrofuran, methanol, and trichloromethane. The sample was then transferred to a vacuum chamber and evacuated to 20 mTorr at 50 °C for 24 h, yielding COFs as chartreuse powders (yield: 33.1 mg, 83.6%).

### 3. Preparation of cathode

Lithium polysulfides (LiPS) adsorption:

The sublimated sulfur and  $\text{Li}_2\text{S}$  were dissolved in dimethyl ether solution with a molar ratio of 5:1, and stirred at  $60^\circ\text{C}$  until the liquid turned yellow ( $0.4 \text{ mol/L}$ ) to obtain  $\text{Li}_2\text{S}_6$  solution. Then  $0.1 \text{ mL } 0.4 \text{ mol L}^{-1}$  poly-lithium sulfide solution was mixed with  $9.9 \text{ mL}$  dimethyl ether solution to obtain  $10 \text{ mL}$  diluted  $\text{Li}_2\text{S}_6$  /DME test solution. For the next  $20 \text{ min}$ ,  $20 \text{ mg}$  of COF was put into  $10 \text{ mL}$  of  $\text{Li}_2\text{S}_6$  /DME solutions next to vigorous stirring, then leave to rest. All of the experiments were carried out in an argon-filled glove box. Finally,  $0.2 \text{ mL}$  of supernatant was taken and diluted with  $2.0 \text{ mL}$  DME to measure the UV-visible absorbance.

**S@COFs:**

COF and sulfur powder were added with a weight ratio of 4:6 to a mortar, grinding for  $30 \text{ minutes}$  to blend thoroughly. The mixture was then sealed in a glass tube filled with nitrogen and heated to  $155^\circ\text{C}$  at the heating rate of  $2^\circ\text{C min}^{-1}$  for  $12 \text{ hours}$ , to obtain S@COFs.

**Li-S Cell Assembly and Electrochemical Measurements:**

The S@COF, Ketjen black and polyvinylidene fluoride (PVDF) binder at a mass ratio of 7:2:1 combined with N-methyl-2-pyrrolidone (NMP) as a dispersant to make the cathode slurry, then the slurry was uniformly cast on the aluminum foil and dried at  $60^\circ\text{C}$  for  $12 \text{ h}$ , and the acquired piece was sliced into a film disk of  $12 \text{ mm}$  in diameter. The areal mass loading of sulfur was approximately  $0.45 \text{ mg/cm}^2$ . The CR2025 coin cells were assembled with Li metal as an anode, and  $1 \text{ mol/L}$  LITFSI +  $1 \text{ wt\%}$  lithium nitrate ( $\text{LiNO}_3$ ) dissolved in the mixed solvent of dimethoxyethane (DME) and 1,2-dioxolane (DOL) (1:1, v:v) as an electrolyte, and a microporous polypropylene film (Celgard 2400) was employed as a separator. About  $15 \text{ }\mu\text{L}$  of electrolyte was added for each coin cell. In addition, the coin cells were gathered in a glove box with low oxygen and water content filled with argon. The galvanostatic cycling performance tests were conducted at  $25^\circ\text{C}$  on Neware battery test equipment in the voltage range of  $1.7\text{--}2.8 \text{ V}$  with different C rates.

## 4. Experimental data

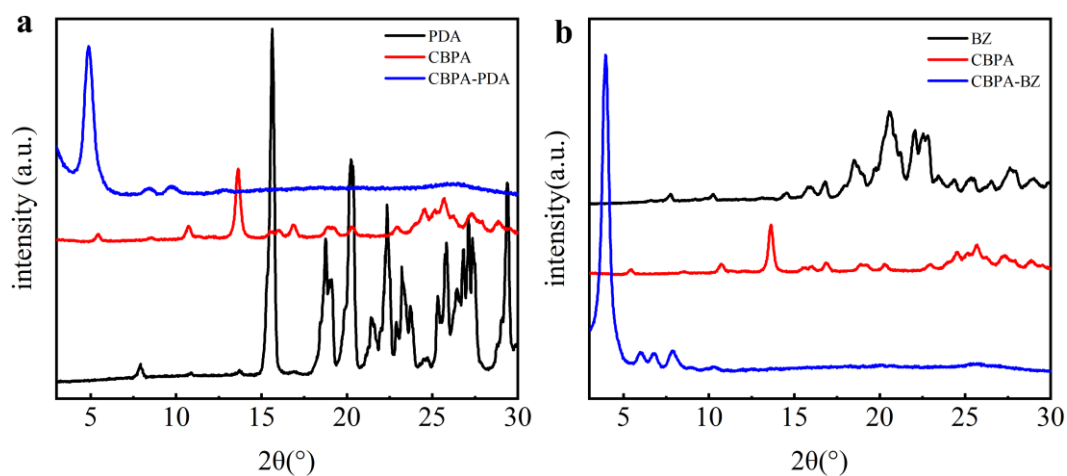

Figure S1. PXRD of (a) CBPA-PDA and (b) CBPA-BZ

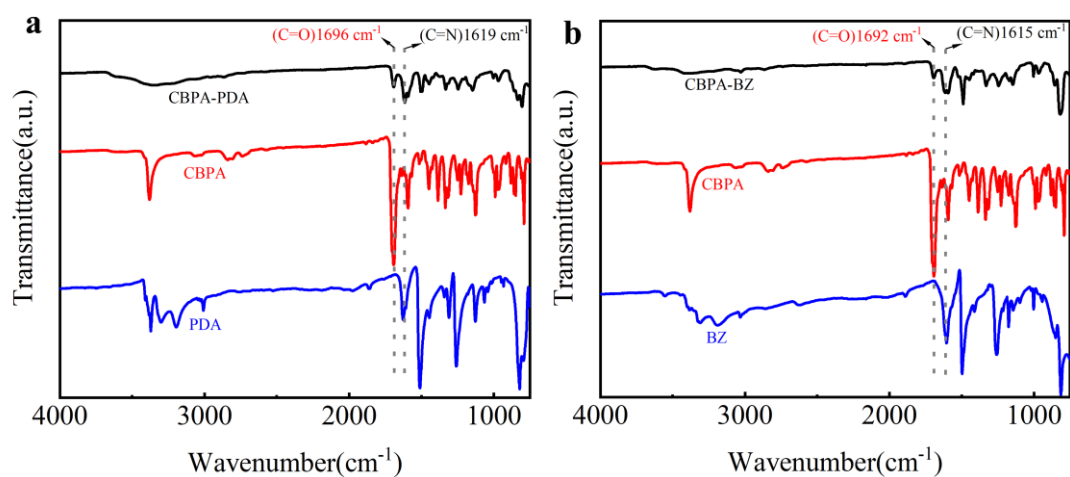

Figure S2. FT-IR curve of (a) CBPA-PDA and (b) CBPA-BZ

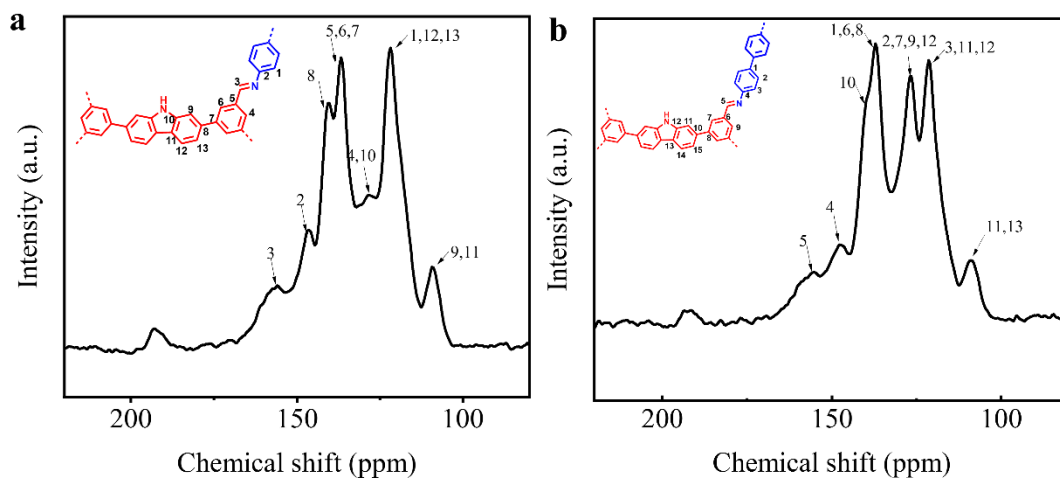

Figure S3. Solid-state  $^{13}\text{C}$  NMR spectra of (a) CBPA-PDA and (b) CBPA-BZ

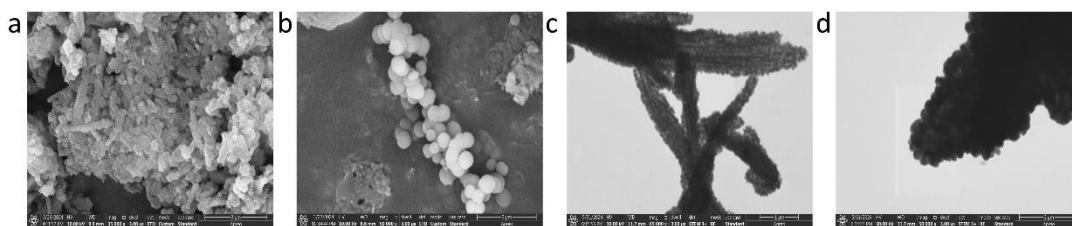

Figure S4. SEM of (a) CBPA-PDA and (b) CBPA-BZ, TEM of (b) CBPA-PDA and (d) CBPA-BZ

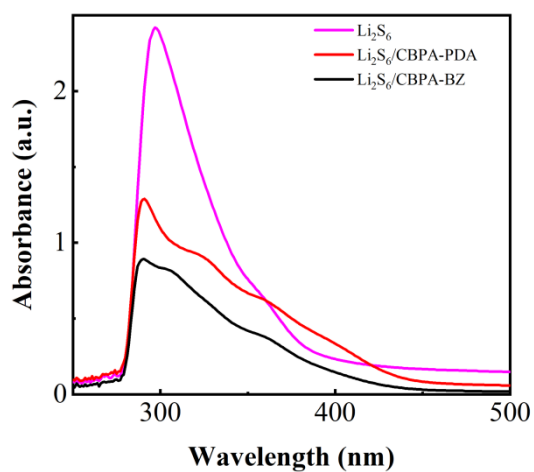

Figure S5. UV-vis spectra of  $\text{Li}_2\text{S}_6$  solution after the adsorption by CBPA-PDA and CBPA-BZ

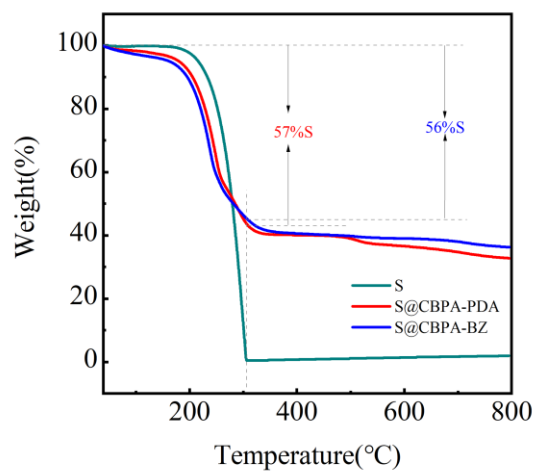

Figure S6. The TGA curves of S, S@CBPA-PDA and S@CBPA-BZ

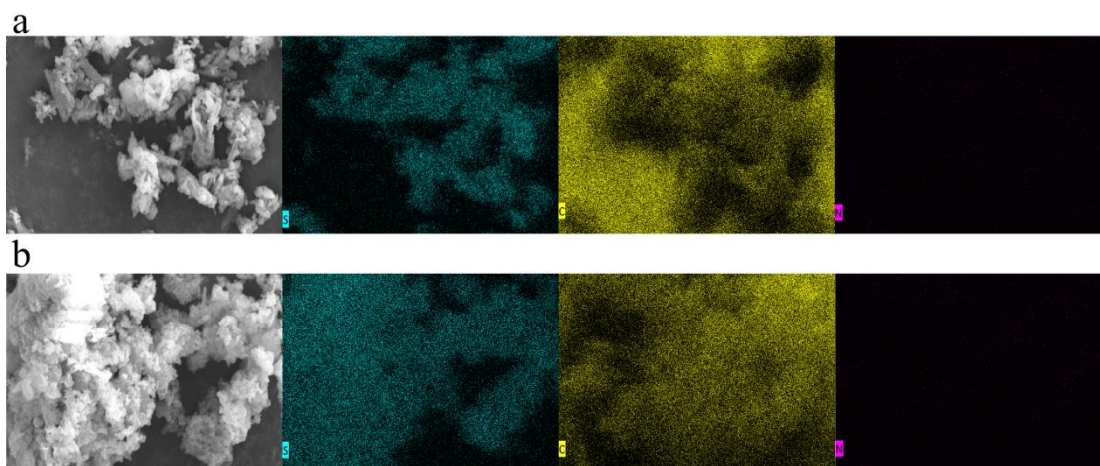

Figure S7. SEM and EDX elemental mapping image of (a) S@CBPA-PDA and (b) S@CBPA-BZ

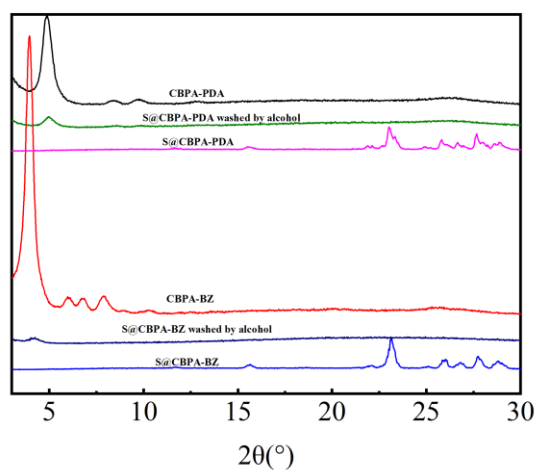

Figure S8. PXRD of S@COFs, S@COFs (washed by alcohol) and COFs

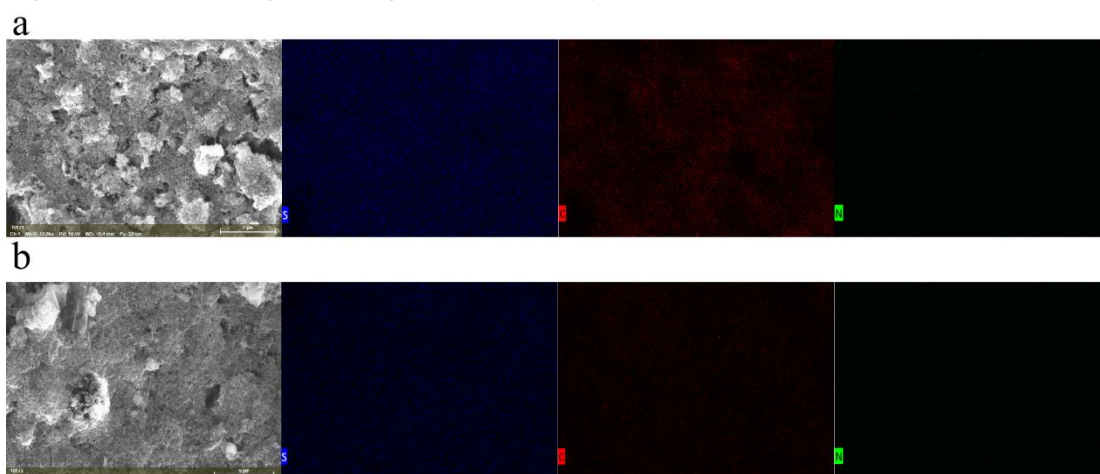

Figure S9. SEM and EDX elemental mapping image of (a) S@CBPA-PDA and (b) S@CBPA-BZ electrodes



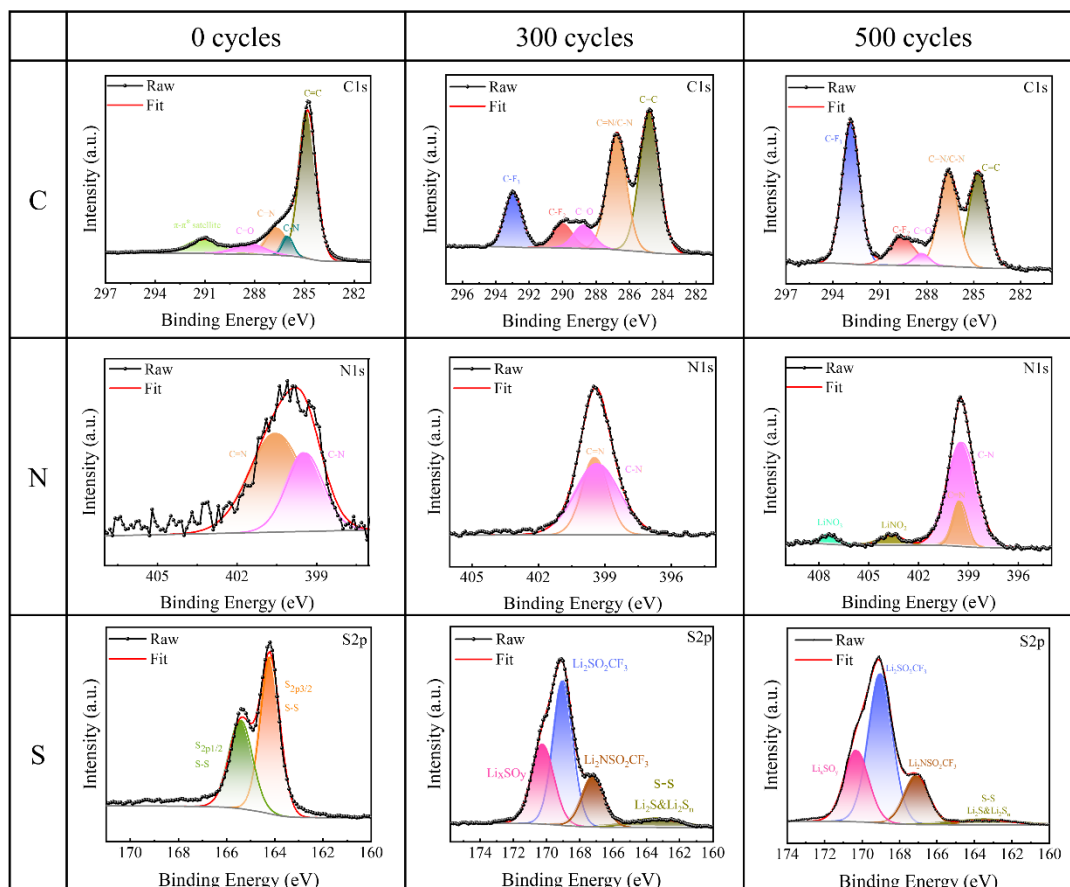

Figure S10. X-ray photo-electron spectra of S@CPBA-PDA electrode about C1s, N1s and S2p

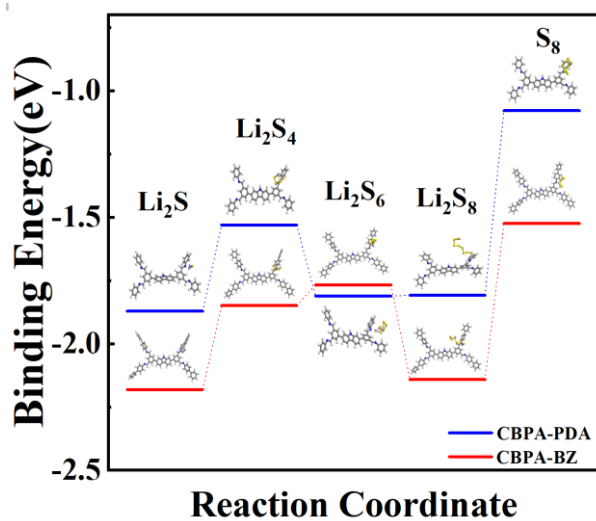

Figure S11. Binding energy between LiPSs and representative models from CBPA coupled with four PDA/BZ monomers via imine linkages.

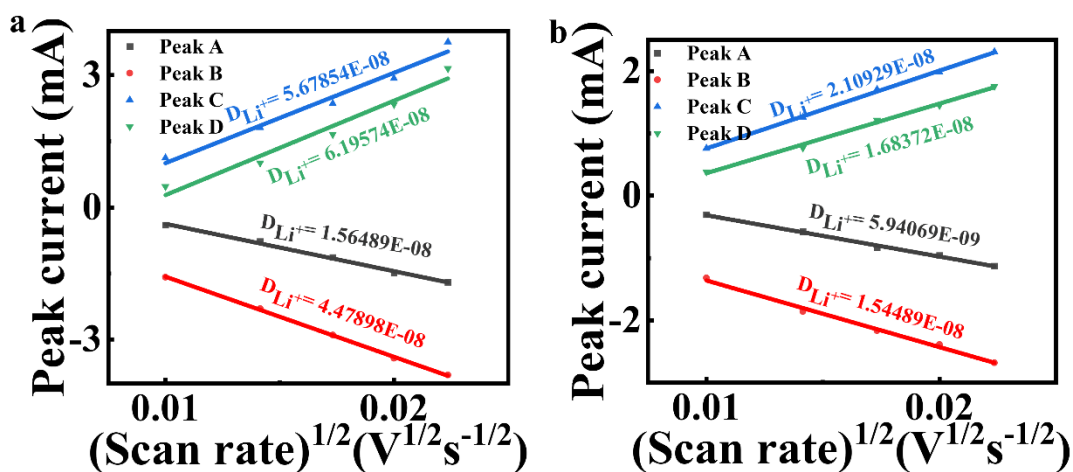

Figure S12. Linear relationship with the square root of the scanning rate and peak current of (a) S@CBPA-PDA and (b) S@CBPA-BZ electrode.

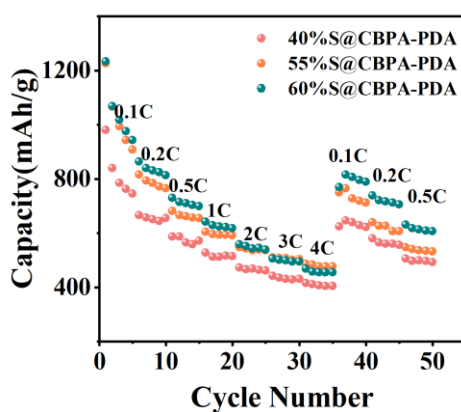

Figure S13. Rate capacity of S@CBPA-PDA cathodes with different sulfur-loaded samples

Table S1. Elemental analyses (C, H and N) for COFs

| Sample   | Calculated/Found % |           |            | Calculated C/N | Found C/N |
|----------|--------------------|-----------|------------|----------------|-----------|
|          | C                  | H         | N          |                |           |
| CBPA-PDA | 83.47/82.63        | 4.35/5.87 | 12.18/11.5 | 6.86           | 7.18      |
| CBPA-BZ  | 85.83/84.92        | 4.54/5.36 | 9.63/9.72  | 8.91           | 8.74      |

Table S2. Elemental analyses (C, H, N and S) for S@COFs

| Sample     | Found % |      |      |       |
|------------|---------|------|------|-------|
|            | C       | H    | N    | S     |
| S@CBPA-PDA | 30.69   | 2.64 | 4.42 | 62.25 |
| S@CBPA-BZ  | 32.96   | 2.55 | 3.67 | 60.82 |

## 5. Structure simulation data

Table S3. Fractional atomic coordinates for simulated CBPA-PDA

| Space group: P21                                       |           |          |         |          |
|--------------------------------------------------------|-----------|----------|---------|----------|
| a = 3.66 Å, b = 36.81 Å, c = 21.61 Å                   |           |          |         |          |
| $\alpha = \gamma = 90.0^\circ$ , $\beta = 104.0^\circ$ |           |          |         |          |
| Atom label                                             | Atom type | x        | y       | z        |
| C1                                                     | C         | 0.51316  | 0.70636 | 0.37215  |
| N2                                                     | N         | 0.40493  | 0.69296 | 0.42026  |
| C3                                                     | C         | 0.35521  | 0.71673 | 0.4706   |
| C4                                                     | C         | 0.51707  | 0.72987 | 0.58372  |
| C5                                                     | C         | 0.46689  | 0.70481 | 0.53374  |
| N6                                                     | N         | -0.01246 | 0.20561 | -0.12484 |
| C7                                                     | C         | -0.1296  | 0.22969 | -0.08091 |
| C8                                                     | C         | -0.23426 | 0.23904 | 0.02447  |
| C9                                                     | C         | -0.14982 | 0.21603 | -0.0215  |
| C10                                                    | C         | 0.00962  | 0.31393 | 0.28087  |
| C11                                                    | C         | 0.12887  | 0.35024 | 0.27855  |
| C12                                                    | C         | 0.59189  | 0.68545 | 0.31878  |
| C13                                                    | C         | 0.53773  | 0.64781 | 0.30882  |
| C14                                                    | C         | 0.50081  | 0.56559 | 0.2835   |
| C15                                                    | C         | 0.42686  | 0.52944 | 0.26397  |
| C16                                                    | C         | 0.21288  | 0.43317 | 0.26747  |
| C17                                                    | C         | 0.30094  | 0.46937 | 0.25691  |
| C18                                                    | C         | -0.214   | 0.29773 | 0.22635  |
| C19                                                    | C         | 0.0217   | 0.3701  | 0.22066  |
| C20                                                    | C         | 0.14451  | 0.40857 | 0.21492  |
| C21                                                    | C         | 0.30886  | 0.48115 | 0.19673  |
| C22                                                    | C         | 0.9147   | 0.71587 | 0.1761   |
| C23                                                    | C         | -0.43503 | 0.29405 | 0.11078  |
| N24                                                    | N         | -0.31784 | 0.30161 | 0.06038  |
| C25                                                    | C         | -0.30516 | 0.27616 | 0.01101  |
| C26                                                    | C         | -0.22022 | 0.26656 | -0.0952  |
| C27                                                    | C         | -0.3002  | 0.28954 | -0.04906 |
| N28                                                    | N         | 0.57894  | 0.79433 | 0.61944  |
| C29                                                    | C         | 0.45812  | 0.7673  | 0.57072  |
| C30                                                    | C         | 0.24599  | 0.75344 | 0.45857  |
| C31                                                    | C         | 0.29754  | 0.77843 | 0.50842  |
| C32                                                    | C         | 0.79114  | 0.69099 | 0.22012  |
| C33                                                    | C         | 0.7411   | 0.65371 | 0.20973  |

|     |   |          |          |          |
|-----|---|----------|----------|----------|
| C34 | C | -0.30108 | 0.31588  | 0.16853  |
| C35 | C | -0.19501 | 0.35214  | 0.16594  |
| C36 | C | 0.18192  | 0.42152  | 0.15451  |
| C37 | C | 0.25686  | 0.45796  | 0.14495  |
| C38 | C | 0.43478  | 0.58129  | 0.17099  |
| C39 | C | 0.37679  | 0.54489  | 0.15334  |
| C40 | C | 0.71452  | 0.70629  | 0.27403  |
| C41 | C | 0.60384  | 0.63149  | 0.25282  |
| C42 | C | 0.514    | 0.59232  | 0.2363   |
| C43 | C | 0.38136  | 0.51969  | 0.20099  |
| C44 | C | 0.12363  | 0.28994  | 0.3365   |
| N45 | N | 0.623    | -0.00072 | 0.69967  |
| H46 | H | 0.56689  | 0.73516  | 0.37114  |
| H47 | H | 0.61856  | 0.72022  | 0.63223  |
| H48 | H | 0.54263  | 0.67665  | 0.54391  |
| H49 | H | -0.22333 | 0.22815  | 0.07139  |
| H50 | H | -0.08532 | 0.18777  | -0.01012 |
| H51 | H | 0.3096   | 0.36234  | 0.32075  |
| H52 | H | 0.42674  | 0.63218  | 0.34245  |
| H53 | H | 0.54989  | 0.57231  | 0.33358  |
| H54 | H | 0.18778  | 0.4249   | 0.31429  |
| H55 | H | -0.29511 | 0.26947  | 0.22765  |
| H56 | H | 0.90746  | 0.74439  | 0.18685  |
| H57 | H | -0.56024 | 0.26787  | 0.11538  |
| H58 | H | -0.22863 | 0.27825  | -0.1413  |
| H59 | H | -0.35042 | 0.3181   | -0.05948 |
| H60 | H | 0.14177  | 0.76338  | 0.41036  |
| H61 | H | 0.2369   | 0.80687  | 0.49817  |
| H62 | H | 0.81654  | 0.64238  | 0.16842  |
| H63 | H | -0.28121 | 0.36577  | 0.1204   |
| H64 | H | 0.15542  | 0.40358  | 0.11409  |
| H65 | H | 0.27731  | 0.46763  | 0.09859  |
| H66 | H | 0.4104   | 0.60071  | 0.13273  |
| H67 | H | 0.32105  | 0.5368   | 0.10371  |
| H68 | H | 0.75275  | 0.73531  | 0.2813   |
| H69 | H | -0.04191 | 0.26552  | 0.33588  |
| H70 | H | 0.62993  | -0.0011  | 0.65163  |

Table S4. Fractional atomic coordinates for simulated CBPA-BZ

|                                      |
|--------------------------------------|
| Space group: P21                     |
| a = 4.00 Å, b = 45.00 Å, c = 25.60 Å |

| $\alpha = \gamma = 90.0^\circ, \beta = 93.3^\circ$ |           |          |         |          |
|----------------------------------------------------|-----------|----------|---------|----------|
| Atom label                                         | Atom type | x        | y       | z        |
| C1                                                 | C         | 0.32586  | 0.66805 | 0.37066  |
| N2                                                 | N         | 0.53172  | 0.67694 | 0.40839  |
| C3                                                 | C         | 0.45386  | 0.69823 | 0.44749  |
| C4                                                 | C         | 0.60241  | 0.71975 | 0.53247  |
| C5                                                 | C         | 0.61989  | 0.69637 | 0.49686  |
| C6                                                 | C         | -0.37936 | 0.27797 | -0.02944 |
| C7                                                 | C         | -0.52305 | 0.2967  | 0.05542  |
| C8                                                 | C         | -0.52204 | 0.27371 | 0.01877  |
| C9                                                 | C         | -0.00219 | 0.35761 | 0.25897  |
| C10                                                | C         | 0.11282  | 0.38715 | 0.25671  |
| C11                                                | C         | 0.45917  | 0.65644 | 0.32256  |
| C12                                                | C         | 0.41527  | 0.62685 | 0.30646  |
| C13                                                | C         | 0.44536  | 0.56183 | 0.27681  |
| C14                                                | C         | 0.39824  | 0.53301 | 0.25744  |
| C15                                                | C         | 0.18145  | 0.45489 | 0.25327  |
| C16                                                | C         | 0.28058  | 0.4844  | 0.24687  |
| C17                                                | C         | -0.21008 | 0.34641 | 0.21785  |
| C18                                                | C         | 0.02742  | 0.40497 | 0.21233  |
| C19                                                | C         | 0.14929  | 0.43626 | 0.2085   |
| C20                                                | C         | 0.33954  | 0.49557 | 0.19813  |
| C21                                                | C         | 0.91316  | 0.6901  | 0.21283  |
| C22                                                | C         | -0.45753 | 0.34807 | 0.12845  |
| N23                                                | N         | -0.31064 | 0.34632 | 0.08465  |
| C24                                                | C         | -0.38087 | 0.32453 | 0.04446  |
| C25                                                | C         | -0.25247 | 0.30615 | -0.04134 |
| C26                                                | C         | -0.25156 | 0.3291  | -0.0045  |
| C27                                                | C         | 0.42339  | 0.74582 | 0.5188   |
| C28                                                | C         | 0.26451  | 0.72376 | 0.43424  |
| C29                                                | C         | 0.25012  | 0.7474  | 0.46958  |
| C30                                                | C         | 0.75068  | 0.6674  | 0.24433  |
| C31                                                | C         | 0.72074  | 0.63749 | 0.22914  |
| C32                                                | C         | -0.28653 | 0.36319 | 0.17317  |
| C33                                                | C         | -0.16821 | 0.39232 | 0.17025  |
| C34                                                | C         | 0.22496  | 0.44813 | 0.15902  |
| C35                                                | C         | 0.31695  | 0.47798 | 0.15355  |
| C36                                                | C         | 0.49573  | 0.57853 | 0.18665  |
| C37                                                | C         | 0.45638  | 0.54926 | 0.16845  |
| C38                                                | C         | 0.61765  | 0.67654 | 0.29079  |
| C39                                                | C         | 0.54666  | 0.61683 | 0.25937  |

|     |   |          |         |          |
|-----|---|----------|---------|----------|
| C40 | C | 0.49733  | 0.58535 | 0.24102  |
| C41 | C | 0.41103  | 0.52701 | 0.20487  |
| C42 | C | 0.10554  | 0.33625 | 0.30031  |
| N43 | N | 0.6819   | 0.00693 | 0.71378  |
| H44 | H | 0.07145  | 0.6755  | 0.36877  |
| H45 | H | 0.74596  | 0.71815 | 0.56953  |
| H46 | H | 0.7757   | 0.67728 | 0.50676  |
| H47 | H | -0.61789 | 0.2919  | 0.09313  |
| H48 | H | -0.62326 | 0.25227 | 0.02876  |
| H49 | H | 0.27801  | 0.3957  | 0.28817  |
| H50 | H | 0.27274  | 0.61216 | 0.33013  |
| H51 | H | 0.44307  | 0.56549 | 0.31847  |
| H52 | H | 0.12213  | 0.44701 | 0.29156  |
| H53 | H | -0.29763 | 0.32363 | 0.21909  |
| H54 | H | 0.92406  | 0.71248 | 0.22822  |
| H55 | H | -0.66208 | 0.33337 | 0.1365   |
| H56 | H | -0.13422 | 0.30989 | -0.07777 |
| H57 | H | -0.1333  | 0.35006 | -0.01294 |
| H58 | H | 0.14144  | 0.72602 | 0.3957   |
| H59 | H | 0.10752  | 0.76704 | 0.45823  |
| H60 | H | 0.83739  | 0.63053 | 0.19411  |
| H61 | H | -0.23407 | 0.40505 | 0.13533  |
| H62 | H | 0.2136   | 0.43432 | 0.12439  |
| H63 | H | 0.36821  | 0.48703 | 0.11569  |
| H64 | H | 0.51679  | 0.59582 | 0.15774  |
| H65 | H | 0.45343  | 0.5443  | 0.12708  |
| H66 | H | 0.63891  | 0.69961 | 0.30281  |
| H67 | H | 0.72967  | 0.00529 | 0.67424  |
| C68 | C | 2.5613   | 1.27174 | 1.44524  |
| C69 | C | 2.50812  | 1.30068 | 1.46405  |
| C70 | C | 2.44488  | 1.32431 | 1.42909  |
| C71 | C | 2.4285   | 1.31922 | 1.3751   |
| C72 | C | 2.50335  | 1.29069 | 1.35648  |
| C73 | C | 2.57035  | 1.26729 | 1.39113  |
| N74 | N | 2.31526  | 1.34236 | 1.33949  |
| C75 | C | 0.33115  | 0.75253 | 2.06501  |
| C76 | C | 0.20576  | 0.72535 | 2.04507  |
| C77 | C | 0.11632  | 0.7027  | 2.07897  |
| C78 | C | 0.14841  | 0.70681 | 2.13313  |
| C79 | C | 0.29568  | 0.73323 | 2.15311  |
| C80 | C | 0.38419  | 0.75591 | 2.11931  |

|     |   |         |         |         |
|-----|---|---------|---------|---------|
| N81 | N | 0.0123  | 0.68461 | 2.16636 |
| H82 | H | 2.4981  | 1.30476 | 1.5056  |
| H83 | H | 2.38965 | 1.34618 | 1.44393 |
| H84 | H | 2.50163 | 1.2864  | 1.31489 |
| H85 | H | 2.61984 | 1.24546 | 1.37556 |
| H86 | H | 0.161   | 0.72215 | 2.00335 |
| H87 | H | 0.34017 | 0.73661 | 2.1947  |
| H88 | H | 0.48923 | 0.77631 | 2.13556 |
| H89 | H | 0.00589 | 0.68242 | 2.0631  |
| H90 | H | 0.00817 | 0.31387 | 0.29612 |

## 6. Others

Table S5. A summary of covalent organic frameworks as sulfur-loading materials for LSBs

| Materials       | Sulfur loading (wt.%) | Capacity (CD <sup>a</sup> /RC <sup>b</sup> ) | Voltage range (vs. Li/Li <sup>+</sup> ) | Cycling performance (CD/CN <sup>c</sup> /RC) | Ref       |
|-----------------|-----------------------|----------------------------------------------|-----------------------------------------|----------------------------------------------|-----------|
| S@CBPA-PDA      | 60                    | 0.1/1232<br>4.0/468                          | 1.7–2.8                                 | 1.0/500/461                                  | This work |
| S@CBPA-BZ       | 60                    | 0.1/987<br>4.0/436                           | 1.7–2.8                                 | 1.0/500/429                                  |           |
| S/Co/Zr-NC@TpPa | 60                    | 0.2/1120<br>3.0/701                          | 1.7–2.8                                 | 1.0/500/502                                  | [3]       |
| COF-MF@S-60%    | 60                    | 0.1/1266<br>2.0/743                          | 1.7–2.8                                 | 0.5/300/749                                  | [4]       |
| S-Co@COF-Ph-OH  | /                     | 0.1/1350<br>2.0/678                          | /                                       | 0.5/200/655                                  | [5]       |
| COF-SH@PVDF-HFP | 60                    | 0.1/1359<br>2.0/688.7                        | 1.7–2.8                                 | 2.0/800/569                                  | [6]       |
| DAAQ-COF@S      | 70                    | 0.1/1182<br>4.0/616.8                        | 1.7-2.8                                 | 2.0/500/525                                  | [7]       |
| S/Co-NC@TpBD-Me | 75                    | 0.2/1178<br>5.0/543                          | 1.7-2.8                                 | 1.0/500/636                                  | [8]       |
| R-COF-BTD@S     | 60                    | 0.1/1594<br>2.0/731                          | 1.7-2.6                                 | 0.5/200/872                                  | [9]       |
| COF-Tr-BA@S     | 60                    | 0.1/1400<br>2.0/714                          | /                                       | 0.5/200/627                                  | [10]      |
| S@EB-COF-PS     | 70                    | 0.1/1136<br>5.0/661                          | /                                       | 0.5/500/555                                  | [11]      |
| S-COF-V         | 67                    | 0.2/1400<br>6.0/431                          | 1.7-2.8                                 | 1.0/1000/416                                 | [12]      |

|                                                                       |    |                     |         |                           |      |
|-----------------------------------------------------------------------|----|---------------------|---------|---------------------------|------|
| COF-301@S                                                             | 60 | 0.2/940<br>1.0/603  | 1.7-2.8 | 0.5/500/411               | [13] |
| SO <sub>3</sub> <sup>-</sup><br>COF@Al <sub>2</sub> O <sub>3</sub> /S | 90 | 0.05/1141           | 1.7-2.8 | 1.0/500/466               | [14] |
| COF-PA-AI/S                                                           | 40 | 0.1/920<br>2.0/518  | 1.7-2.8 | 0.5/200/665               | [15] |
| 3DOM TpPa-1<br>@Co/TiO <sub>x</sub> Ny/S                              | 80 | 0.2/1173<br>5.0/638 | 1.7-2.8 | 1.0/500/817               | [16] |
| S@TFPB-TAA                                                            | 58 | 0.1/1288<br>2.0/537 | 1.7-2.8 | 0.5/400/482               | [17] |
| S@TFPB-TAB                                                            | 61 | 0.1/1192<br>2.0/586 | 1.7-2.8 | 0.5/400/480               |      |
| COF-SQ-Ph-S                                                           | 40 | 0.1/1370<br>2.0/733 | 1.7-2.8 | 0.5/150/618               | [18] |
| S@THZ-DMTD                                                            | 82 | 0.1/1149<br>2.0/499 | 1.7-2.8 | 0.5/200/556               | [19] |
| S-DUT-177                                                             | 62 | 0.06/720<br>0.6/276 | 1.2-2.8 | 0.3/500/76.6 <sup>d</sup> | [20] |
| COF-F-S                                                               | 75 | 0.1/1120<br>2.0/325 | 1.7-2.8 | 1.0/1000/257              | [21] |
| S@3D-flu-COF                                                          | 70 | 0.2/1249<br>5.0/764 | 1.7-2.8 | 0.5/100/1024              | [22] |
| S@3D-scu-COF-1                                                        | 70 | 0.2/1025<br>5.0/713 | 1.7-2.8 | 2.0/500/71%               | [23] |
| S@3D-scu-COF-2                                                        | 70 | 0.2/1025<br>5.0/757 | 1.7-2.8 | 2.0/500/83%               | [23] |

<sup>a</sup> CD: current density (C), <sup>b</sup> RC: reversible capacity (mA h g<sup>-1</sup>), <sup>c</sup> CN: cycle number, <sup>d</sup> retention rate

## 7. References

1. Y. Zhu, J. Yang, X. Qiu, M. Li, G. He, Q. Wang, Z. Xie, X. Li, H. Yu. *ACS applied materials & interfaces*, 2021, **13**, 60373.
2. D. Wetzell, U. Lüning. *European Journal of Organic Chemistry*, 2022, **2022**, e202200983.
3. T. Lin, H. Wang, X. Du, D. Zhang, Z. Zhang, G. Liu. *Electrochimica Acta*, 2022, **412**, 140156.
4. X. Hu, J. Jian, Z. Fang, L. Zhong, Z. Yuan, M. Yang, S. Ren, Q. Zhang, X. Chen, D. Yu. *Energy Storage Materials*, 2019, **22**, 40.
5. Z. Wu, L. Feng, J. Luo, Y. Zhao, X. Yu, Y. Li, W. Wang, Z. Sui, X. Tian, Q. Chen. *Journal of Colloid and Interface Science*, 2023, **650**, 1466.
6. L. Bi, J. Xiao, Y. Song, T. Sun, M. Luo, Y. Wang, P. Dong, Y. Zhang, Y. Yao, J. Liao, S. Wang, S. Chou. *Carbon Energy*, 2024.
7. S. Cai, R. Ma, W. Ke, H. Zhang, Y. Liu, M. Jiao, Y. Tian, Y. Fang, M. Wu, Z. Zhou. *Chemical*



- Engineering Journal*, 2024, **491**, 151979.
8. B. Du, Y. Luo, Y. Yang, W. Xue, G. Liu, J. Li. *Chemical Engineering Journal*, 2022, **442**, 135823.
9. Y. Ge, Y. Meng, L. Liu, J. Li, X. Huang, D. Xiao. *Green Energy & Environment*, 2023.
10. Y. Liang, T. Xia, Z. Chang, W. Xie, Y. Li, C. Li, R. Fan, W. Wang, Z. Sui, Q. Chen. *Chemical Engineering Journal*, 2022, **437**, 135314.
11. X. F. Liu, H. Chen, R. Wang, S. Q. Zang, T. C. Mak. *Small*, 2020, **16**, 2002932.
12. Q. Jiang, Y. Li, X. Zhao, P. Xiong, X. Yu, Y. Xu, L. Chen. *Journal of Materials Chemistry A*, 2018, **6**, 17977.
13. Z. Li, H.-Y. Zhou, F.-L. Zhao, T.-X. Wang, X. Ding, B.-H. Han, W. Feng. *Chinese Journal of Polymer Science*, 2020, **38**, 550.
14. B. Jia, W. Liu, C. Yao, W. Xie, Y. Xu. *Chemical Communications*, 2024, **60**, 6435.
15. X. Liu, M. Xia, Y. Zhao, T. Xia, Y. Li, J. Xiao, Z. Sui, Q. Chen. *Materials Today Chemistry*, 2022, **23**, 100664.
16. H. Wang, J. Jiang, T. Wan, Y. Luo, G. Liu, J. Li. *Journal of Colloid and Interface Science*, 2023, **638**, 542.
17. Z. Wang, X. Wu, S. Wei, Y. Xie, C.-Z. Lu. *Chemistry of Materials*, 2024, **36**, 2412.
18. Y. Liang, M. Xia, Y. Zhao, D. Wang, Y. Li, Z. Sui, J. Xiao, Q. Chen. *Journal of Colloid and Interface Science*, 2022, **608**, 652.
19. R. Yan, B. Mishra, M. Traxler, J. Roeser, N. Chaoui, B. Kumbhakar, J. Schmidt, S. Li, A. Thomas, P. Pachfule. *Angewandte Chemie International Edition*, 2023, **62**, e202302276.
20. S. Haldar, M. Wang, P. Bhauriyal, A. Hazra, A. H. Khan, V. Bon, M. A. Isaacs, A. De, L. Shupletsov, T. Boenke. *Journal of the American Chemical Society*, 2022, **144**, 9101.
21. D.-G. Wang, N. Li, Y. Hu, S. Wan, M. Song, G. Yu, Y. Jin, W. Wei, K. Han, G.-C. Kuang. *ACS applied materials & interfaces*, 2018, **10**, 42233.
22. W. Liu, K. Wang, X. Zhan, Z. Liu, X. Yang, Y. Jin, B. Yu, L. Gong, H. Wang, D. Qi. *Journal of the American Chemical Society*, 2023, **145**, 8141-8149.
23. W. Liu, L. Gong, Z. Liu, Y. Jin, H. Pan, X. Yang, B. Yu, N. Li, D. Qi, K. Wang. *Journal of the American Chemical Society*, 2022, **144**, 17209-17218.
